# Supplementary material for: Improvement effects of calcium silicate hydrate and humic acid-encapsulated Alcaligenes faecalis on acidic farmland soil and alterations in microbial community structure
Source: Research Square preprint supplement (doi:10.21203/rs.3.rs-7738393/v1), 2025-10-23
Supplement: Supplementary file 1 [file 730940a8d5982629d4f0f938.docx]

**Improvement effects of calcium silicate hydrate and humic acid-encapsulated *Alcaligenes faecalis* on acidic farmland soil and alterations in microbial community structure**

Luhua Jiang 1 2 3, Manjun Miao 1 2, Ziwen Guo 1 2, Jiejie Yang 1 2, Yulong Peng 1 2, Junzhao Wu 1 2, Bo Miao 1 2, Xueduan Liu 1 2 3, *

1 School of Minerals Processing and Bioengineering, Central South University, Changsha 410083, China

2 Key Laboratory of Biometallurgy of Ministry of Education, Central South University, Changsha 410083, China

3 Yuelushan Laboratory, Changsha 410128, China

* Correspondence: xueduanliu@csu.edu.cn (X.D. Liu)

# Contents:

**Fig. S1** Pearson correlation between soil environmental factors in S1 (a), S2 (b), S3 (c) and S4 (d). Note: orange indicates positive correlation and blue indicates negative correlation; * *P*＜0.05; ** *P*＜0.01; *** *P*＜0.001

**Fig. S2** Venn diagram (a) and alpha diversity (b) of soil microbial community under different treatments

**Fig. S3** The RDA plot between microbial community structures (genus level) and environmental factors in different treatment groups. Note: blue arrows represent taxa; red arrows represent environmental factors; the angle between the arrows represents correlation (acute angle: positive correlation; obtuse angle: negative correlation; right angle: no correlation)


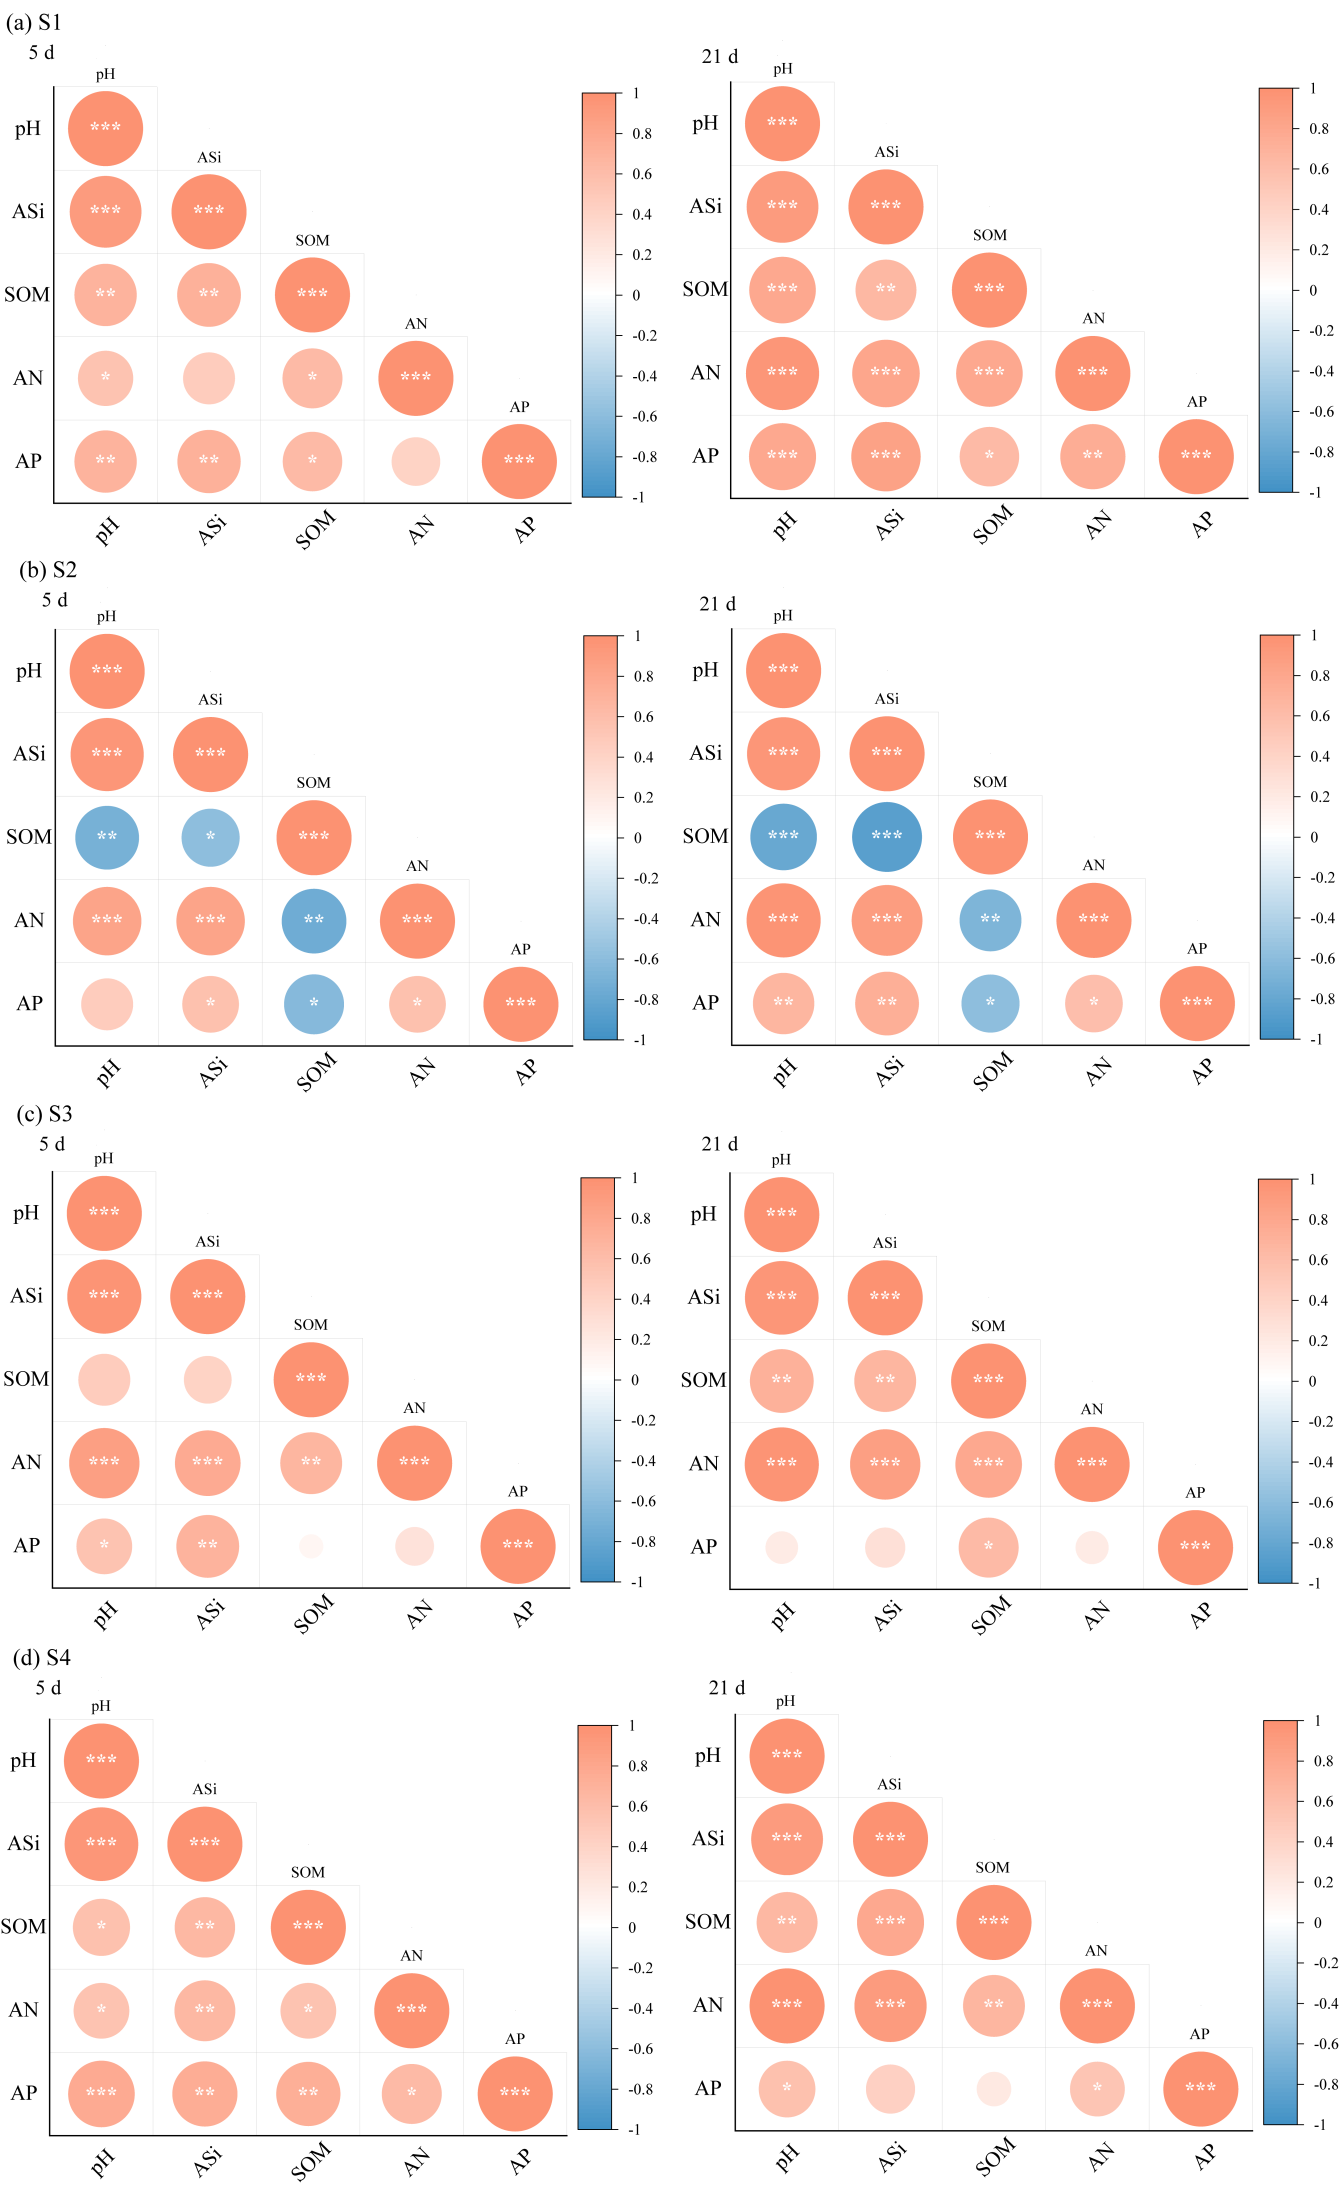


# **Fig. S1** Pearson correlation between soil environmental factors in S1 (a), S2 (b), S3 (c) and S4 (d). Note: orange indicates positive correlation and blue indicates negative correlation; * *P*＜0.05; ** *P*＜0.01; *** *P*＜0.001


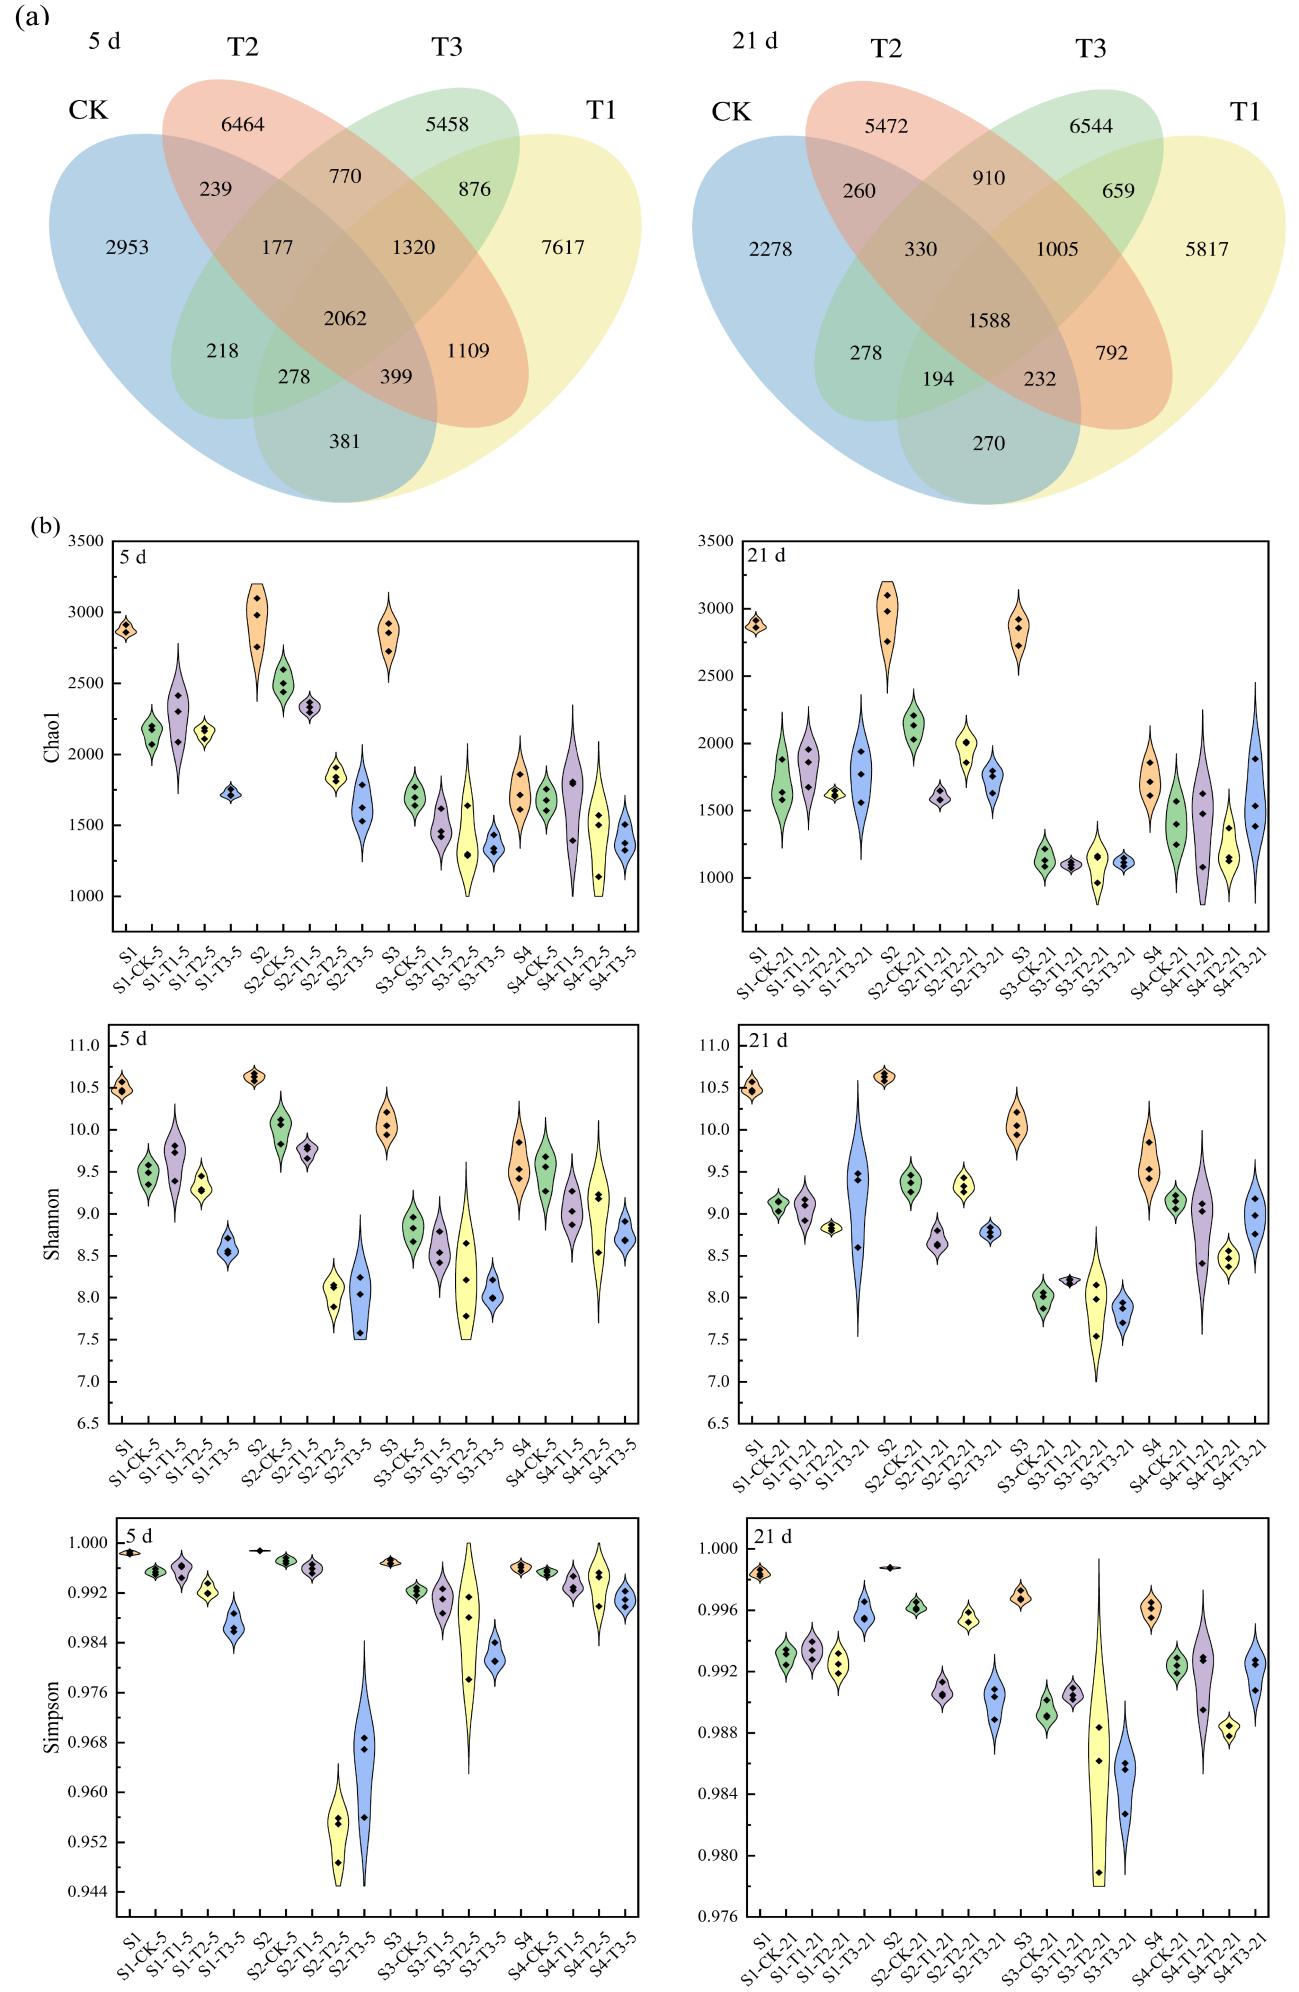


# **Fig. S2** Venn diagram (a) and alpha diversity (b) of soil microbial community under different treatments


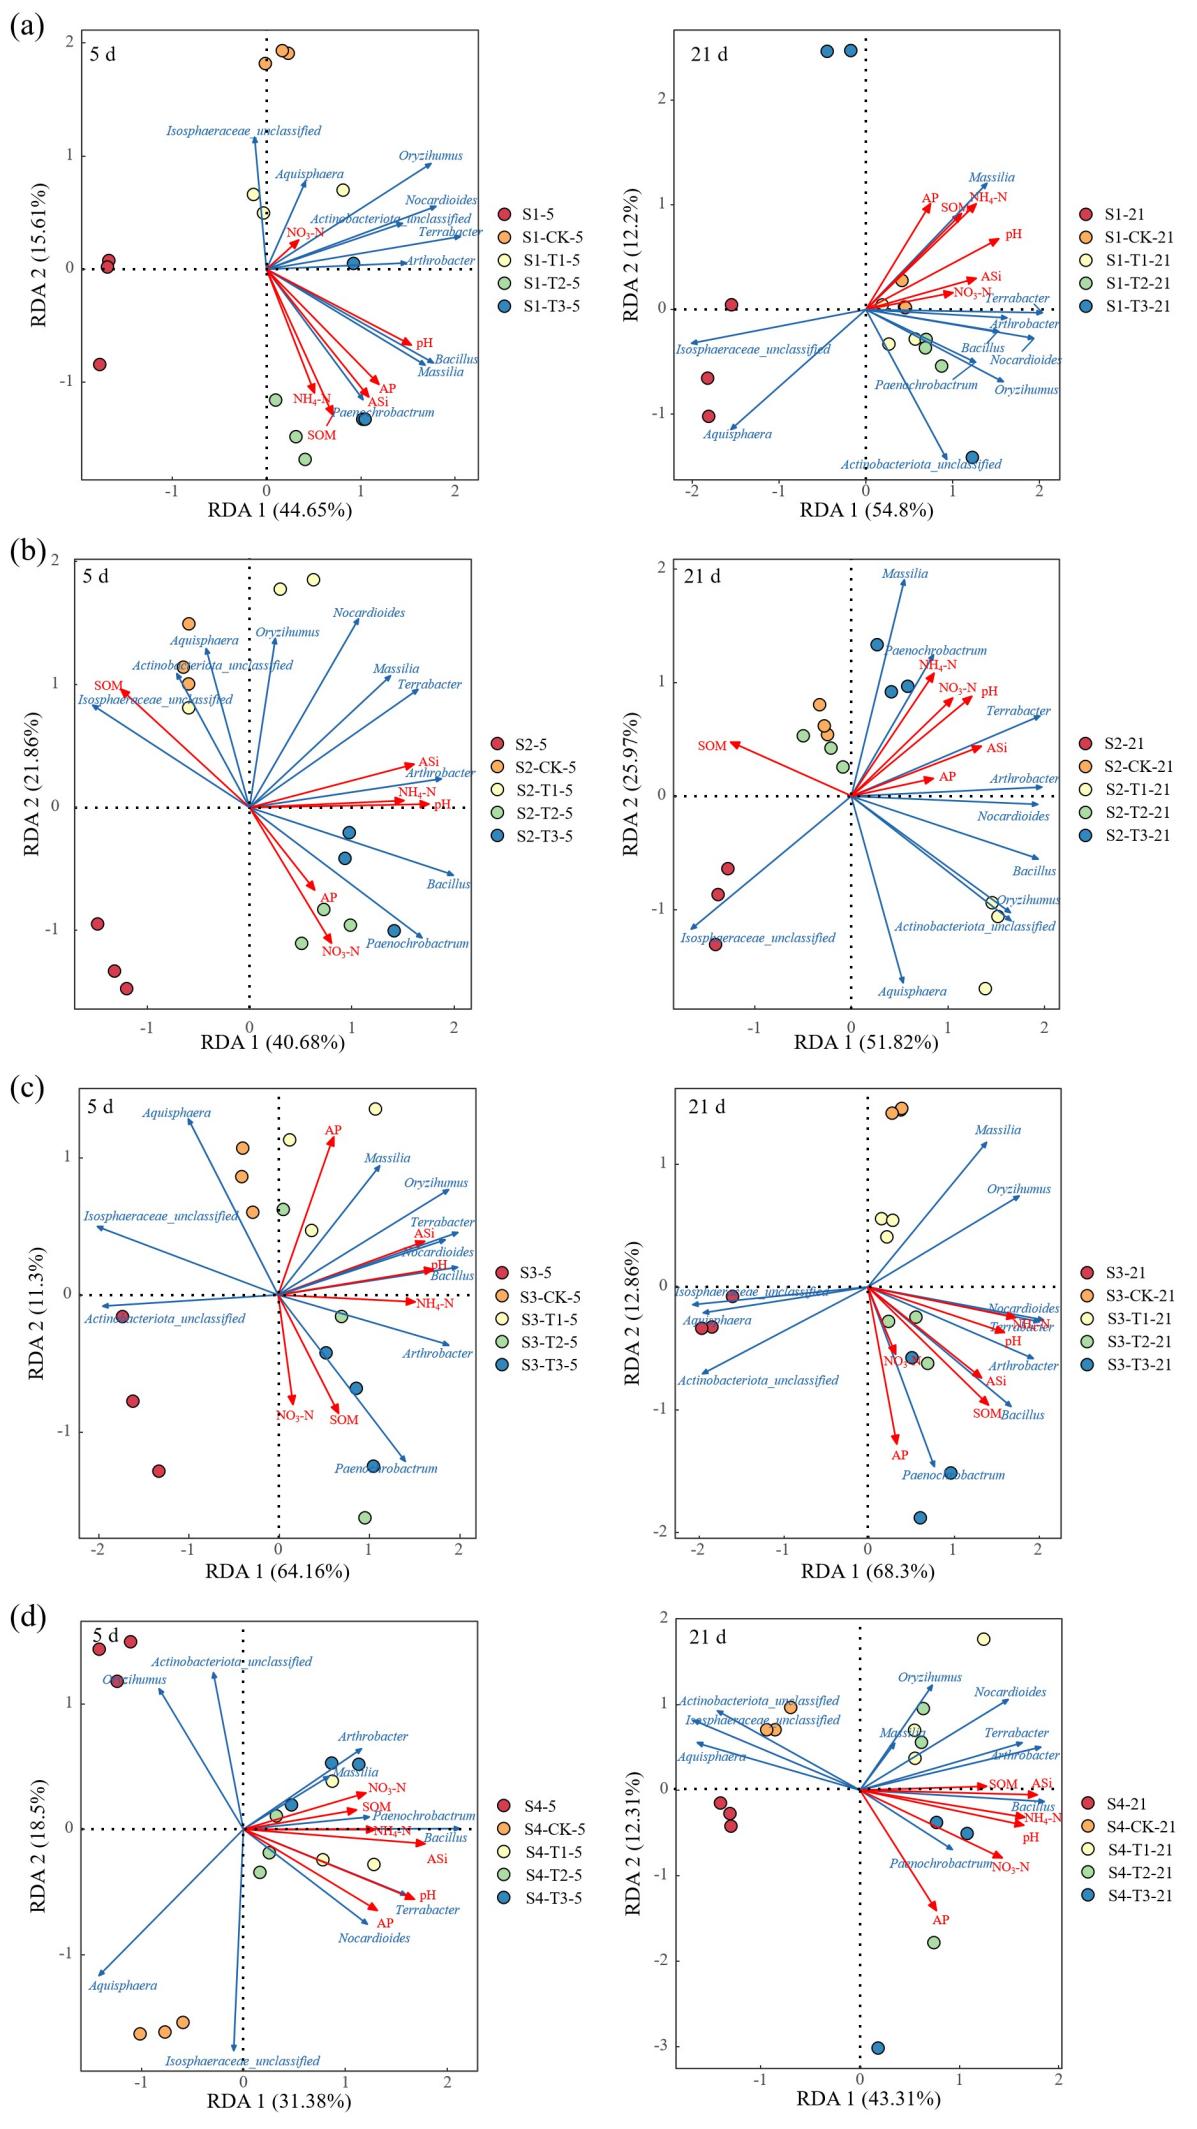


# **Fig. S3** The RDA plot between microbial community structures (genus level) and environmental factors in different treatment groups. Note: blue arrows represent taxa; red arrows represent environmental factors; the angle between the arrows represents correlation (acute angle: positive correlation; obtuse angle: negative correlation; right angle: no correlation)
